# Supplementary material for: PTCHD1 Binds Cholesterol but Not Sonic Hedgehog, Suggesting a Distinct Cellular Function
Source: Int J Mol Sci. 2023 Jan 31;24(3):2682. doi: 10.3390/ijms24032682 (PMC9917202; doi:10.3390/ijms24032682)
Supplement: Supplementary file 1 [file ijms-24-02682-s001.zip › 2022_IJMS_PTCHD1_supplementary_table2_MS_hits .xlsx]

## Sheet: Sheet1
40S ribosomal protein S10 OS=Homo sapiens OX=9606 GN=RPS10 PE=1 SV=1
40S ribosomal protein S10 OS=Homo sapiens OX=9606 GN=RPS10 PE=4 SV=1
40S ribosomal protein S10 OS=Homo sapiens OX=9606 GN=RPS10 PE=4 SV=1
40S ribosomal protein S10 OS=Homo sapiens OX=9606 GN=RPS10 PE=4 SV=1
40S ribosomal protein S11 OS=Homo sapiens OX=9606 GN=RPS11 PE=1 SV=1
40S ribosomal protein S11 OS=Homo sapiens OX=9606 GN=RPS11 PE=1 SV=3
40S ribosomal protein S12 OS=Homo sapiens OX=9606 GN=RPS12 PE=1 SV=3
40S ribosomal protein S13 OS=Homo sapiens OX=9606 GN=RPS13 PE=1 SV=2
40S ribosomal protein S14 (Fragment) OS=Homo sapiens OX=9606 GN=RPS14 PE=1 SV=1
40S ribosomal protein S14 OS=Homo sapiens OX=9606 GN=RPS14 PE=1 SV=3
40S ribosomal protein S15a OS=Homo sapiens OX=9606 GN=RPS15A PE=1 SV=1
40S ribosomal protein S15a OS=Homo sapiens OX=9606 GN=RPS15A PE=1 SV=2
40S ribosomal protein S16 OS=Homo sapiens OX=9606 GN=RPS16 PE=1 SV=2
40S ribosomal protein S18 OS=Homo sapiens OX=9606 GN=RPS18 PE=1 SV=3
40S ribosomal protein S19 OS=Homo sapiens OX=9606 GN=RPS19 PE=1 SV=2
40S ribosomal protein S19 OS=Homo sapiens OX=9606 GN=RPS19 PE=2 SV=1
40S ribosomal protein S20 OS=Homo sapiens OX=9606 GN=RPS20 PE=1 SV=1
40S ribosomal protein S25 OS=Homo sapiens OX=9606 GN=RPS25 PE=1 SV=1
40S ribosomal protein S3a OS=Homo sapiens OX=9606 GN=RPS3A PE=1 SV=1
40S ribosomal protein S3a OS=Homo sapiens OX=9606 GN=RPS3A PE=1 SV=2
40S ribosomal protein S3a OS=Homo sapiens OX=9606 GN=RPS3A PE=2 SV=1
40S ribosomal protein S3a OS=Homo sapiens OX=9606 GN=RPS3A PE=2 SV=1
40S ribosomal protein S3a OS=Homo sapiens OX=9606 GN=RPS3A PE=2 SV=1
40S ribosomal protein S5 (Fragment) OS=Homo sapiens OX=9606 GN=RPS5 PE=1 SV=1
40S ribosomal protein S5 OS=Homo sapiens OX=9606 GN=RPS5 PE=1 SV=1
40S ribosomal protein S5 OS=Homo sapiens OX=9606 GN=RPS5 PE=1 SV=1
40S ribosomal protein S5 OS=Homo sapiens OX=9606 GN=RPS5 PE=1 SV=4
40S ribosomal protein S7 OS=Homo sapiens OX=9606 GN=RPS7 PE=1 SV=1
40S ribosomal protein S9 OS=Homo sapiens OX=9606 GN=RPS9 PE=1 SV=1
40S ribosomal protein S9 OS=Homo sapiens OX=9606 GN=RPS9 PE=1 SV=1
40S ribosomal protein S9 OS=Homo sapiens OX=9606 GN=RPS9 PE=1 SV=1
40S ribosomal protein S9 OS=Homo sapiens OX=9606 GN=RPS9 PE=1 SV=3
40S ribosomal protein SA (Fragment) OS=Homo sapiens OX=9606 GN=RPSA PE=1 SV=8
40S ribosomal protein SA OS=Homo sapiens OX=9606 GN=RPSA PE=1 SV=1
40S ribosomal protein SA OS=Homo sapiens OX=9606 GN=RPSA PE=1 SV=4
40S ribosomal protein SA OS=Homo sapiens OX=9606 GN=RPSA PE=3 SV=1
60 kDa heat shock protein mitochondrial OS=Homo sapiens OX=9606 GN=HSPD1 PE=1 SV=2
60S acidic ribosomal protein P0 (Fragment) OS=Homo sapiens OX=9606 GN=RPLP0 PE=1 SV=1
60S acidic ribosomal protein P0 (Fragment) OS=Homo sapiens OX=9606 GN=RPLP0 PE=1 SV=1
60S acidic ribosomal protein P0 (Fragment) OS=Homo sapiens OX=9606 GN=RPLP0 PE=1 SV=1
60S acidic ribosomal protein P0 (Fragment) OS=Homo sapiens OX=9606 PE=2 SV=1
60S acidic ribosomal protein P0 OS=Homo sapiens OX=9606 GN=RPLP0 PE=1 SV=1
60S acidic ribosomal protein P0 OS=Homo sapiens OX=9606 GN=RPLP0 PE=1 SV=1
60S acidic ribosomal protein P0 OS=Homo sapiens OX=9606 GN=RPLP0 PE=1 SV=1
60S acidic ribosomal protein P0 OS=Homo sapiens OX=9606 GN=RPLP0 PE=3 SV=1
60S acidic ribosomal protein P0 OS=Homo sapiens OX=9606 PE=2 SV=1
60S acidic ribosomal protein P0-like OS=Homo sapiens OX=9606 GN=RPLP0P6 PE=5 SV=1
60S acidic ribosomal protein P2 OS=Homo sapiens OX=9606 GN=RPLP2 PE=1 SV=1
60S ribosomal protein L10a OS=Homo sapiens OX=9606 GN=RPL10A PE=1 SV=2
60S ribosomal protein L11 OS=Homo sapiens OX=9606 GN=RPL11 PE=1 SV=2
60S ribosomal protein L11 OS=Homo sapiens OX=9606 GN=RPL11 PE=1 SV=2
60S ribosomal protein L23 OS=Homo sapiens OX=9606 GN=RPL23 PE=1 SV=1
60S ribosomal protein L27 OS=Homo sapiens OX=9606 GN=RPL27 PE=1 SV=2
60S ribosomal protein L27 OS=Homo sapiens OX=9606 GN=RPL27 PE=3 SV=1
ADP/ATP translocase 2 OS=Homo sapiens OX=9606 GN=SLC25A5 PE=1 SV=7
Albumin (Fragment) OS=Homo sapiens OX=9606 PE=2 SV=1
Alpha-enolase OS=Homo sapiens OX=9606 GN=ENO1 PE=1 SV=2
Ataxin-2-like protein OS=Homo sapiens OX=9606 GN=ATXN2L PE=1 SV=2
ATP-dependent RNA helicase DDX3X OS=Homo sapiens OX=9606 GN=DDX3X PE=1 SV=1
ATP-dependent RNA helicase DDX3X OS=Homo sapiens OX=9606 GN=DDX3X PE=1 SV=1
ATP-dependent RNA helicase DDX3X OS=Homo sapiens OX=9606 GN=DDX3X PE=1 SV=1
ATP-dependent RNA helicase DDX3X OS=Homo sapiens OX=9606 GN=DDX3X PE=1 SV=1
ATP-dependent RNA helicase DDX3X OS=Homo sapiens OX=9606 GN=DDX3X PE=1 SV=1
ATP-dependent RNA helicase DDX3X OS=Homo sapiens OX=9606 GN=DDX3X PE=1 SV=1
ATP-dependent RNA helicase DDX3X OS=Homo sapiens OX=9606 GN=DDX3X PE=1 SV=1
ATP-dependent RNA helicase DDX3X OS=Homo sapiens OX=9606 GN=DDX3X PE=1 SV=1
ATP-dependent RNA helicase DDX3X OS=Homo sapiens OX=9606 GN=DDX3X PE=1 SV=1
ATP-dependent RNA helicase DDX3X OS=Homo sapiens OX=9606 GN=DDX3X PE=1 SV=1
ATP-dependent RNA helicase DDX3X OS=Homo sapiens OX=9606 GN=DDX3X PE=1 SV=1
ATP-dependent RNA helicase DDX3X OS=Homo sapiens OX=9606 GN=DDX3X PE=1 SV=1
ATP-dependent RNA helicase DDX3X OS=Homo sapiens OX=9606 GN=DDX3X PE=1 SV=1
ATP-dependent RNA helicase DDX3X OS=Homo sapiens OX=9606 GN=DDX3X PE=1 SV=1
ATP-dependent RNA helicase DDX3X OS=Homo sapiens OX=9606 GN=DDX3X PE=1 SV=3
ATP-dependent RNA helicase DDX3X OS=Homo sapiens OX=9606 GN=DDX3X PE=2 SV=1
ATPase family AAA domain-containing protein 3A (Fragment) OS=Homo sapiens OX=9606 GN=ATAD3A PE=1 SV=1
ATPase family AAA domain-containing protein 3A OS=Homo sapiens OX=9606 GN=ATAD3A PE=1 SV=2
BTB/POZ domain-containing adapter for CUL3-mediated RhoA degradation protein 3 OS=Homo sapiens OX=9606 GN=KCTD10 PE=1 SV=1
cDNA FLJ92712 highly similar to Homo sapiens heterogeneous nuclear ribonucleoprotein C (C1/C2) (HNRPC) transcript variant 1 mRNA OS=Homo sapiens OX=9606 PE=2 SV=1
cDNA FLJ93750 Homo sapiens DEAD (Asp-Glu-Ala-Asp) box polypeptide 6 (DDX6) mRNA OS=Homo sapiens OX=9606 PE=2 SV=1
cDNA FLJ95666 highly similar to Homo sapiens albumin (ALB) mRNA OS=Homo sapiens OX=9606 PE=2 SV=1
cDNA FLJ45003 fis clone BRAWH3011623 highly similar to Heterogeneous nuclear ribonucleoproteins C OS=Homo sapiens OX=9606 PE=2 SV=1
cDNA FLJ50830 highly similar to Serum albumin OS=Homo sapiens OX=9606 PE=2 SV=1
cDNA FLJ53312 highly similar to Heterogeneous nuclear ribonucleoprotein K OS=Homo sapiens OX=9606 PE=2 SV=1
cDNA FLJ53619 highly similar to Heat shock protein HSP 90-beta OS=Homo sapiens OX=9606 PE=2 SV=1
cDNA FLJ54023 highly similar to Heat shock protein HSP 90-beta OS=Homo sapiens OX=9606 PE=2 SV=1
cDNA FLJ54303 highly similar to Heat shock 70 kDa protein 1 OS=Homo sapiens OX=9606 PE=2 SV=1
cDNA FLJ54371 highly similar to Serum albumin OS=Homo sapiens OX=9606 PE=2 SV=1
cDNA FLJ54373 highly similar to 60 kDa heat shock protein mitochondrial OS=Homo sapiens OX=9606 PE=2 SV=1
cDNA FLJ54552 highly similar to Heterogeneous nuclear ribonucleoprotein K OS=Homo sapiens OX=9606 PE=2 SV=1
cDNA FLJ61636 highly similar to 40S ribosomal protein S9 OS=Homo sapiens OX=9606 PE=2 SV=1
cDNA FLJ75154 highly similar to Homo sapiens heterogeneous nuclear ribonucleoprotein C (C1/C2) mRNA OS=Homo sapiens OX=9606 PE=2 SV=1
cDNA FLJ76053 highly similar to Homo sapiens Ras-GTPase activating protein SH3 domain-binding protein 2 (G3BP2) transcript variant 3 mRNA OS=Homo sapiens OX=9606 PE=2 SV=1
Cell growth-inhibiting protein 34 OS=Homo sapiens OX=9606 PE=2 SV=1
DDB1- and CUL4-associated factor 7 OS=Homo sapiens OX=9606 GN=DCAF7 PE=1 SV=1
DEAD box polypeptide 17 isoform p82 variant (Fragment) OS=Homo sapiens OX=9606 PE=2 SV=1
DEAD/H (Asp-Glu-Ala-Asp/His) box polypeptide 3 variant (Fragment) OS=Homo sapiens OX=9606 PE=2 SV=1
Dermcidin OS=Homo sapiens OX=9606 GN=DCD PE=1 SV=2
Dual specificity tyrosine-phosphorylation-regulated kinase 1A OS=Homo sapiens OX=9606 GN=DYRK1A PE=1 SV=2
Dual-specificity tyrosine-phosphorylation-regulated kinase 1A (Fragment) OS=Homo sapiens OX=9606 GN=DYRK1A PE=1 SV=1
Dual-specificity tyrosine-phosphorylation-regulated kinase 1A (Fragment) OS=Homo sapiens OX=9606 GN=DYRK1A PE=1 SV=1
Dual-specificity tyrosine-phosphorylation-regulated kinase 1A OS=Homo sapiens OX=9606 GN=DYRK1A PE=1 SV=1
E3 ubiquitin-protein ligase TRIM21 OS=Homo sapiens OX=9606 GN=TRIM21 PE=1 SV=1
Elongation factor 1-alpha OS=Homo sapiens OX=9606 GN=EEF1A1 PE=2 SV=1
Enolase 1 (Alpha) isoform CRA_a OS=Homo sapiens OX=9606 GN=ENO1 PE=2 SV=1
Epididymis luminal protein 112 OS=Homo sapiens OX=9606 GN=HEL112 PE=2 SV=1
Epididymis secretory sperm binding protein OS=Homo sapiens OX=9606 GN=HSPD1 PE=2 SV=1
Glyceraldehyde-3-phosphate dehydrogenase OS=Homo sapiens OX=9606 GN=GAPDH PE=1 SV=3
Glyceraldehyde-3-phosphate dehydrogenase OS=Homo sapiens OX=9606 GN=HEL-S-162eP PE=2 SV=1
Glyceraldehyde-3-phosphate dehydrogenase OS=Homo sapiens OX=9606 PE=2 SV=1
HCG15971 isoform CRA_a OS=Homo sapiens OX=9606 GN=PS1TP5BP1 PE=2 SV=1
HCG1994130 isoform CRA_a OS=Homo sapiens OX=9606 GN=hCG_1994130 PE=2 SV=1
Heat shock 70 kDa protein 1B OS=Homo sapiens OX=9606 GN=HSPA1B PE=1 SV=1
Heat shock cognate 71 kDa protein OS=Homo sapiens OX=9606 GN=HSPA8 PE=1 SV=1
Heat shock cognate 71 kDa protein OS=Homo sapiens OX=9606 GN=HSPA8 PE=1 SV=1
Heat shock protein 90kDa alpha (Cytosolic) class B member 1 isoform CRA_a OS=Homo sapiens OX=9606 GN=HSP90AB1 PE=3 SV=1
Heat shock protein HSP 90-beta OS=Homo sapiens OX=9606 GN=HSP90AB1 PE=1 SV=4
Heterogeneous nuclear ribonucleoprotein K isoform CRA_d OS=Homo sapiens OX=9606 GN=HNRPK PE=4 SV=1
Heterogeneous nuclear ribonucleoprotein K OS=Homo sapiens OX=9606 GN=HNRNPK PE=1 SV=1
Heterogeneous nuclear ribonucleoprotein K transcript variant OS=Homo sapiens OX=9606 GN=HNRPK PE=2 SV=1
Heterogeneous nuclear ribonucleoprotein M isoform a variant (Fragment) OS=Homo sapiens OX=9606 PE=2 SV=1
Heterogeneous nuclear ribonucleoprotein M OS=Homo sapiens OX=9606 GN=HNRNPM PE=1 SV=1
Heterogeneous nuclear ribonucleoprotein M OS=Homo sapiens OX=9606 GN=HNRNPM PE=1 SV=3
Heterogeneous nuclear ribonucleoproteins C1/C2 (Fragment) OS=Homo sapiens OX=9606 GN=HNRNPC PE=1 SV=1
Heterogeneous nuclear ribonucleoproteins C1/C2 OS=Homo sapiens OX=9606 GN=HNRNPC PE=1 SV=1
Heterogeneous nuclear ribonucleoproteins C1/C2 OS=Homo sapiens OX=9606 GN=HNRNPC PE=1 SV=1
Heterogeneous nuclear ribonucleoproteins C1/C2 OS=Homo sapiens OX=9606 GN=HNRNPC PE=1 SV=1
Heterogeneous nuclear ribonucleoproteins C1/C2 OS=Homo sapiens OX=9606 GN=HNRNPC PE=1 SV=1
Heterogeneous nuclear ribonucleoproteins C1/C2 OS=Homo sapiens OX=9606 GN=HNRNPC PE=1 SV=1
Heterogeneous nuclear ribonucleoproteins C1/C2 OS=Homo sapiens OX=9606 GN=HNRNPC PE=1 SV=4
Histone H2A OS=Homo sapiens OX=9606 GN=H2AFJ PE=3 SV=1
Histone H2A OS=Homo sapiens OX=9606 GN=hCG_2039566 PE=3 SV=1
Histone H2A OS=Homo sapiens OX=9606 GN=HIST1H2AB PE=2 SV=1
Histone H2A OS=Homo sapiens OX=9606 GN=HIST1H2AC PE=3 SV=1
Histone H2A OS=Homo sapiens OX=9606 GN=HIST1H2AH PE=2 SV=1
Histone H2A OS=Homo sapiens OX=9606 GN=HIST1H2AK PE=2 SV=1
Histone H2A OS=Homo sapiens OX=9606 PE=2 SV=1
Histone H2A OS=Homo sapiens OX=9606 PE=3 SV=1
Histone H2A type 1 OS=Homo sapiens OX=9606 GN=HIST1H2AG PE=1 SV=2
Histone H2A type 1-A OS=Homo sapiens OX=9606 GN=HIST1H2AA PE=1 SV=3
Histone H2A type 1-B/E OS=Homo sapiens OX=9606 GN=HIST1H2AB PE=1 SV=2
Histone H2A type 1-C OS=Homo sapiens OX=9606 GN=HIST1H2AC PE=1 SV=3
Histone H2A type 1-D OS=Homo sapiens OX=9606 GN=HIST1H2AD PE=1 SV=2
Histone H2A type 1-H OS=Homo sapiens OX=9606 GN=HIST1H2AH PE=1 SV=3
Histone H2A type 1-J OS=Homo sapiens OX=9606 GN=HIST1H2AJ PE=1 SV=3
Histone H2A type 2-A OS=Homo sapiens OX=9606 GN=HIST2H2AA3 PE=1 SV=3
Histone H2A type 2-C OS=Homo sapiens OX=9606 GN=HIST2H2AC PE=1 SV=4
Histone H2A type 3 OS=Homo sapiens OX=9606 GN=HIST3H2A PE=1 SV=3
Histone H2A.J OS=Homo sapiens OX=9606 GN=H2AFJ PE=1 SV=1
Histone H2AX OS=Homo sapiens OX=9606 GN=H2AFX PE=1 SV=2
Histone H2B (Fragment) OS=Homo sapiens OX=9606 GN=HIST1H2BM PE=2 SV=1
Histone H2B OS=Homo sapiens OX=9606 GN=HIST1H2BC PE=2 SV=1
Histone H2B OS=Homo sapiens OX=9606 GN=HIST1H2BD PE=3 SV=1
Histone H2B OS=Homo sapiens OX=9606 GN=HIST1H2BJ PE=3 SV=1
Histone H2B OS=Homo sapiens OX=9606 GN=HIST1H2BK PE=3 SV=1
Histone H2B OS=Homo sapiens OX=9606 GN=HIST1H2BN PE=1 SV=1
Histone H2B OS=Homo sapiens OX=9606 GN=HIST1H2BN PE=3 SV=1
Histone H2B OS=Homo sapiens OX=9606 PE=2 SV=1
Histone H2B OS=Homo sapiens OX=9606 PE=2 SV=1
Histone H2B type 1-B OS=Homo sapiens OX=9606 GN=HIST1H2BB PE=1 SV=2
Histone H2B type 1-C/E/F/G/I OS=Homo sapiens OX=9606 GN=HIST1H2BC PE=1 SV=4
Histone H2B type 1-D OS=Homo sapiens OX=9606 GN=HIST1H2BD PE=1 SV=2
Histone H2B type 1-H OS=Homo sapiens OX=9606 GN=HIST1H2BH PE=1 SV=3
Histone H2B type 1-J OS=Homo sapiens OX=9606 GN=HIST1H2BJ PE=1 SV=3
Histone H2B type 1-K OS=Homo sapiens OX=9606 GN=HIST1H2BK PE=1 SV=3
Histone H2B type 1-M OS=Homo sapiens OX=9606 GN=HIST1H2BM PE=1 SV=3
Histone H2B type 1-N OS=Homo sapiens OX=9606 GN=HIST1H2BN PE=1 SV=3
Histone H2B type 1-O OS=Homo sapiens OX=9606 GN=HIST1H2BO PE=1 SV=3
Histone H2B type 2-E OS=Homo sapiens OX=9606 GN=HIST2H2BE PE=1 SV=3
Histone H2B type 2-F OS=Homo sapiens OX=9606 GN=HIST2H2BF PE=1 SV=3
Histone H3 (Fragment) OS=Homo sapiens OX=9606 GN=H3F3B PE=1 SV=1
Histone H3 OS=Homo sapiens OX=9606 GN=H3F3A PE=1 SV=1
Histone H3 OS=Homo sapiens OX=9606 GN=H3F3B PE=1 SV=1
Histone H3 OS=Homo sapiens OX=9606 GN=H3F3B PE=2 SV=1
Histone H3 OS=Homo sapiens OX=9606 PE=2 SV=1
Histone H3 OS=Homo sapiens OX=9606 PE=2 SV=1
Histone H3.1 OS=Homo sapiens OX=9606 GN=HIST1H3A PE=1 SV=2
Histone H3.1t OS=Homo sapiens OX=9606 GN=HIST3H3 PE=1 SV=3
Histone H3.2 OS=Homo sapiens OX=9606 GN=HIST2H3A PE=1 SV=3
Histone H3.3 (Fragment) OS=Homo sapiens OX=9606 GN=H3F3B PE=1 SV=1
Histone H3.3 OS=Homo sapiens OX=9606 GN=H3F3A PE=1 SV=2
Histone H4 OS=Homo sapiens OX=9606 GN=HIST1H4A PE=1 SV=2
Histone H4 OS=Homo sapiens OX=9606 GN=HIST1H4H PE=2 SV=1
Histone H4 OS=Homo sapiens OX=9606 GN=HIST1H4J PE=2 SV=1
Hornerin OS=Homo sapiens OX=9606 GN=HRNR PE=1 SV=2
Insulin-like growth factor 2 mRNA binding protein 1 deltaN CRDBP OS=Homo sapiens OX=9606 GN=IGF2BP1 PE=2 SV=1
Insulin-like growth factor 2 mRNA-binding protein 1 OS=Homo sapiens OX=9606 GN=IGF2BP1 PE=1 SV=2
Insulin-like growth factor 2 mRNA-binding protein 3 OS=Homo sapiens OX=9606 GN=IGF2BP3 PE=1 SV=2
Mitochondrial heat shock 60kD protein 1 variant 1 OS=Homo sapiens OX=9606 GN=HSPD1 PE=2 SV=1
Nuclear fragile X mental retardation-interacting protein 2 OS=Homo sapiens OX=9606 GN=NUFIP2 PE=1 SV=1
PAI-1 mRNA-binding protein variant OS=Homo sapiens OX=9606 PE=2 SV=1
Patched domain containing 1 isoform B (Fragment) OS=Homo sapiens OX=9606 GN=PTCHD1 PE=2 SV=1
Patched domain-containing protein 1 OS=Homo sapiens OX=9606 GN=PTCHD1 PE=2 SV=2
Patched domain-containing protein 1 OS=Homo sapiens OX=9606 GN=PTCHD1 PE=2 SV=2
Plasminogen activator inhibitor 1 RNA-binding protein OS=Homo sapiens OX=9606 GN=SERBP1 PE=1 SV=2
Poly [ADP-ribose] polymerase 1 OS=Homo sapiens OX=9606 GN=PARP1 PE=1 SV=4
Poly [ADP-ribose] polymerase OS=Homo sapiens OX=9606 GN=PARP1 PE=4 SV=1
Poly [ADP-ribose] polymerase OS=Homo sapiens OX=9606 PE=2 SV=1
Poly [ADP-ribose] polymerase OS=Homo sapiens OX=9606 PE=2 SV=1
Polyadenylate-binding protein 1 OS=Homo sapiens OX=9606 GN=PABPC1 PE=1 SV=2
Polyadenylate-binding protein OS=Homo sapiens OX=9606 GN=PABPC4 PE=2 SV=1
Polyubiquitin-B OS=Homo sapiens OX=9606 GN=UBB PE=1 SV=1
Polyubiquitin-B OS=Homo sapiens OX=9606 GN=UBB PE=1 SV=1
Polyubiquitin-C (Fragment) OS=Homo sapiens OX=9606 GN=UBC PE=1 SV=2
Polyubiquitin-C (Fragment) OS=Homo sapiens OX=9606 GN=UBC PE=1 SV=8
Polyubiquitin-C OS=Homo sapiens OX=9606 GN=UBC PE=1 SV=3
Potassium channel tetramerisation domain containing 10 isoform CRA_b OS=Homo sapiens OX=9606 GN=KCTD10 PE=4 SV=1
Probable ATP-dependent RNA helicase DDX17 OS=Homo sapiens OX=9606 GN=DDX17 PE=1 SV=1
Probable ATP-dependent RNA helicase DDX17 OS=Homo sapiens OX=9606 GN=DDX17 PE=1 SV=1
Probable ATP-dependent RNA helicase DDX17 OS=Homo sapiens OX=9606 GN=DDX17 PE=1 SV=2
Probable ATP-dependent RNA helicase DDX6 OS=Homo sapiens OX=9606 GN=DDX6 PE=1 SV=2
Protein FAM76B OS=Homo sapiens OX=9606 GN=FAM76B PE=1 SV=1
Protein FAM76B OS=Homo sapiens OX=9606 GN=FAM76B PE=1 SV=3
Protein LSM12 homolog OS=Homo sapiens OX=9606 GN=LSM12 PE=1 SV=2
Putative elongation factor 1-alpha-like 3 OS=Homo sapiens OX=9606 GN=EEF1A1P5 PE=5 SV=1
Ras GTPase-activating protein-binding protein 2 OS=Homo sapiens OX=9606 GN=G3BP2 PE=1 SV=2
Ras-GTPase activating protein SH3 domain-binding protein 2 isoform CRA_a OS=Homo sapiens OX=9606 GN=G3BP2 PE=4 SV=1
Ras-GTPase activating protein SH3 domain-binding protein 2 isoform CRA_b OS=Homo sapiens OX=9606 GN=G3BP2 PE=4 SV=1
Receptor of activated protein C kinase 1 OS=Homo sapiens OX=9606 GN=RACK1 PE=1 SV=3
Ribosomal protein large P2 isoform CRA_a OS=Homo sapiens OX=9606 GN=RPLP2 PE=3 SV=1
Ribosomal protein L11 isoform CRA_b OS=Homo sapiens OX=9606 GN=RPL11 PE=2 SV=1
Ribosomal protein L23 isoform CRA_b OS=Homo sapiens OX=9606 GN=RPL23 PE=3 SV=1
Ribosomal protein S19 (Fragment) OS=Homo sapiens OX=9606 PE=2 SV=1
Ribosomal protein S5 isoform CRA_a OS=Homo sapiens OX=9606 GN=RPS5 PE=3 SV=1
Ribosomal protein S5 variant (Fragment) OS=Homo sapiens OX=9606 PE=2 SV=1
RPL27/NME2 fusion protein (Fragment) OS=Homo sapiens OX=9606 GN=RPL27 PE=2 SV=1
RPLP0 protein OS=Homo sapiens OX=9606 GN=RPLP0 PE=2 SV=1
RPS10-NUDT3 readthrough (Fragment) OS=Homo sapiens OX=9606 GN=RPS10-NUDT3 PE=4 SV=1
RPS10-NUDT3 readthrough OS=Homo sapiens OX=9606 GN=RPS10-NUDT3 PE=4 SV=1
RPS4X protein (Fragment) OS=Homo sapiens OX=9606 GN=RPS4X PE=2 SV=2
SERPINE1 mRNA binding protein 1 isoform CRA_c OS=Homo sapiens OX=9606 GN=SERBP1 PE=4 SV=1
SERPINE1 mRNA binding protein 1 isoform CRA_d OS=Homo sapiens OX=9606 GN=SERBP1 PE=4 SV=1
Serum albumin OS=Homo sapiens OX=9606 GN=ALB PE=1 SV=1
Serum albumin OS=Homo sapiens OX=9606 GN=ALB PE=1 SV=1
Serum albumin OS=Homo sapiens OX=9606 GN=ALB PE=1 SV=2
Serum albumin OS=Homo sapiens OX=9606 PE=2 SV=1
Similar to Laminin receptor 1 isoform CRA_a OS=Homo sapiens OX=9606 GN=LOC388524 PE=3 SV=1
Similar to ribosomal protein L23 (Fragment) OS=Homo sapiens OX=9606 PE=2 SV=1
Single-stranded DNA binding protein 1 isoform CRA_c OS=Homo sapiens OX=9606 GN=SSBP1 PE=2 SV=1
Single-stranded DNA binding protein 1 OS=Homo sapiens OX=9606 GN=SSBP1 PE=2 SV=1
Single-stranded DNA binding protein 1 OS=Homo sapiens OX=9606 GN=SSBP1 PE=2 SV=1
Single-stranded DNA-binding protein mitochondrial (Fragment) OS=Homo sapiens OX=9606 GN=SSBP1 PE=1 SV=1
Single-stranded DNA-binding protein mitochondrial (Fragment) OS=Homo sapiens OX=9606 GN=SSBP1 PE=1 SV=1
Single-stranded DNA-binding protein mitochondrial (Fragment) OS=Homo sapiens OX=9606 GN=SSBP1 PE=1 SV=1
Single-stranded DNA-binding protein mitochondrial OS=Homo sapiens OX=9606 GN=SSBP1 PE=1 SV=1
SLC25A5 protein (Fragment) OS=Homo sapiens OX=9606 GN=SLC25A5 PE=2 SV=1
Transcriptional repressor protein YY1 OS=Homo sapiens OX=9606 GN=YY1 PE=1 SV=2
Tubulin beta chain OS=Homo sapiens OX=9606 PE=2 SV=1
UBC protein (Fragment) OS=Homo sapiens OX=9606 GN=UBC PE=2 SV=2
Ubiquitin C isoform CRA_a OS=Homo sapiens OX=9606 GN=UbC PE=4 SV=1
Ubiquitin C OS=Homo sapiens OX=9606 GN=UbC PE=4 SV=1
Ubiquitin C OS=Homo sapiens OX=9606 GN=UbC PE=4 SV=1
Ubiquitin carboxyl-terminal hydrolase 34 OS=Homo sapiens OX=9606 GN=USP34 PE=1 SV=2
Ubiquitin-40S ribosomal protein S27a OS=Homo sapiens OX=9606 GN=RPS27A PE=1 SV=2
Ubiquitin-60S ribosomal protein L40 OS=Homo sapiens OX=9606 GN=UBA52 PE=1 SV=2
Uncharacterized protein DKFZp686P17171 OS=Homo sapiens OX=9606 GN=DKFZp686P17171 PE=2 SV=1
