# Supplementary material for: PTCHD1 Binds Cholesterol but Not Sonic Hedgehog, Suggesting a Distinct Cellular Function
Source: Int J Mol Sci. 2023 Jan 31;24(3):2682. doi: 10.3390/ijms24032682 (PMC9917202; doi:10.3390/ijms24032682)
Supplement: Supplementary file 1 [file ijms-24-02682-s001.zip › 2022_IJMS_PTCHD1_supplementary_table3_GO_analysis .xlsx]

## Sheet: PTCHD1-specific proteins
		Fold	p-value	False
Cellular component		enrichment		discovery rate
	cytoplasmic stress granule (GO:0010494)	>100	9.82e-12	2.01e-08
	cytoplasmic ribonucleoprotein granule (GO:0036464)	38.63	5.04e-09	5.14e-06
	ribonucleoprotein granule (GO:0035770)	35.99	7.62e-09	5.18e-06
	ribonucleoprotein complex (GO:1990904)	13.83	1.99e-06	0.000811
	supramolecular complex (GO:0099080)	9.21	3.86e-07	0.000197
	intracellular non-membrane-bounded organelle (GO:0043232)	3.06	0.000134	0.0457
	non-membrane-bounded organelle (GO:0043228)	3.06	0.000135	0.0392
Biological process
	stress granule assembly (GO:0034063)	> 100	1.93e-09	3.03e-05
	non-membrane-bound organelle assembly (GO:0140694)	25.38	9.72e-07	0.00762
Molecular function
	RNA binding (GO:0003723)	7.66	1.58e-06	0.00774

## Sheet: GO biological process
	Analysis Type:	PANTHER Overrepresentation Test (Released 20220712)
	Annotation Version and Release Date:	GO Ontology database DOI: 10.5281/zenodo.6399963 Released 2022-03-22
	Analyzed List:	Client Text Box Input (Homo sapiens)
	Reference List:	Homo sapiens (all genes in database)
	Test Type:	FISHER
	Correction:	FDR
	GO biological process complete	Homo sapiens - REFLIST (20589)	Client Text Box Input (68)	Client Text Box Input (expected)	Client Text Box Input (over/under)	Client Text Box Input (fold Enrichment)	Client Text Box Input (raw P-value)	Client Text Box Input (FDR)
Regulation of mRNA stability involved in response to stress	regulation of mRNA stability involved in response to stress (GO:0010610)	3	2	0.01	+	> 100	0.000106	0.0161
Apoptotic signaling	positive regulation of intrinsic apoptotic signaling pathway by p53 class mediator (GO:1902255)	6	2	0.02	+	> 100	0.000295	0.0364
Negative regulation of protein metabolic process	negative regulation of ubiquitin protein ligase activity (GO:1904667)	13	4	0.04	+	93.16	2.47e-07	9.23e-05
RNA metabolic process	CRD-mediated mRNA stabilization (GO:0070934)	11	3	0.04	+	82.58	1.21e-05	0.00246
Ribosomal small subunit biogenesis	ribosomal small subunit assembly (GO:0000028)	19	4	0.06	+	63.74	9.07e-07	0.00029
Cytoplasmic translation	cytoplasmic translation (GO:0002181)	124	26	0.41	+	63.49	8.5e-39	1.33e-34
Negative regulation of protein metabolic process	negative regulation of ubiquitin-protein transferase activity (GO:0051444)	23	4	0.08	+	52.66	1.78e-06	0.000498
Organelle assembly	stress granule assembly (GO:0034063)	24	4	0.08	+	50.46	2.07e-06	0.00056
Regulation of ubiquitin protein ligase activity	regulation of ubiquitin protein ligase activity (GO:1904666)	26	4	0.09	+	46.58	2.76e-06	0.000721
Positive regulation of intracellular signal transduction	positive regulation of signal transduction by p53 class mediator (GO:1901798)	28	4	0.09	+	43.25	3.6e-06	0.000882
Protein refolding	protein refolding (GO:0042026)	22	3	0.07	+	41.29	7.45e-05	0.0123
Ribosome assembly	ribosome assembly (GO:0042255)	62	8	0.2	+	39.07	7.24e-11	4.05e-08
Negative regulation of gene expression	negative regulation of RNA splicing (GO:0033119)	26	3	0.09	+	34.94	0.000117	0.0175
Negative regulation of ribosome biogenesis	ribosomal large subunit assembly (GO:0000027)	27	3	0.09	+	33.64	0.00013	0.019
Apoptotic signaling	regulation of intrinsic apoptotic signaling pathway by p53 class mediator (GO:1902253)	31	3	0.1	+	29.3	0.00019	0.0252
Ribosomal small subunit biogenesis	ribosomal small subunit biogenesis (GO:0042274)	74	7	0.24	+	28.64	8.75e-09	4.42e-06
Translation	translation (GO:0006412)	377	30	1.25	+	24.09	2.12e-33	1.66e-29
Ribosomal small subunit biogenesis	maturation of SSU-rRNA from tricistronic rRNA transcript (SSU-rRNA, 5.8S rRNA, LSU-rRNA) (GO:0000462)	38	3	0.13	+	23.9	0.000333	0.0401
Negative regulation of ubiquitin-dependent protein catabolic process	negative regulation of ubiquitin-dependent protein catabolic process (GO:2000059)	51	4	0.17	+	23.75	3.23e-05	0.00575
Amide biosynthetic process	peptide biosynthetic process (GO:0043043)	404	30	1.33	+	22.48	1.49e-32	7.77e-29
De novo' protein folding	de novo' protein folding (GO:0006458)	41	3	0.14	+	22.15	0.00041	0.0483
mRNA metabolic process	mRNA stabilization (GO:0048255)	56	4	0.18	+	21.63	4.56e-05	0.00803
Regulation of ubiquitin-protein transferase activity	regulation of ubiquitin-protein transferase activity (GO:0051438)	57	4	0.19	+	21.25	4.87e-05	0.00847
Regulation of intracellular signal transduction	regulation of signal transduction by p53 class mediator (GO:1901796)	103	7	0.34	+	20.58	7.43e-08	2.98e-05
	negative regulation of protein modification by small protein conjugation or removal (GO:1903321)	95	6	0.31	+	19.12	1.01e-06	0.00031
	negative regulation of mRNA metabolic process (GO:1903312)	96	6	0.32	+	18.92	1.07e-06	0.000322
	negative regulation of proteolysis involved in cellular protein catabolic process (GO:1903051)	65	4	0.21	+	18.63	7.9e-05	0.0128
	RNA stabilization (GO:0043489)	65	4	0.21	+	18.63	7.9e-05	0.0126
	negative regulation of protein ubiquitination (GO:0031397)	83	5	0.27	+	18.24	1.06e-05	0.00221
	negative regulation of mRNA catabolic process (GO:1902373)	67	4	0.22	+	18.08	8.84e-05	0.0139
	amide biosynthetic process (GO:0043604)	520	30	1.72	+	17.47	1.83e-29	5.74e-26
	peptide metabolic process (GO:0006518)	538	31	1.78	+	17.45	1.66e-30	6.49e-27
	ribosomal large subunit biogenesis (GO:0042273)	72	4	0.24	+	16.82	0.000115	0.0174
	negative regulation of cellular protein catabolic process (GO:1903363)	78	4	0.26	+	15.53	0.000155	0.0217
	negative regulation of RNA catabolic process (GO:1902369)	79	4	0.26	+	15.33	0.000162	0.0221
	telomere organization (GO:0032200)	102	5	0.34	+	14.84	2.73e-05	0.00503
	ribosome biogenesis (GO:0042254)	296	14	0.98	+	14.32	1.3e-12	8.52e-10
	ribonucleoprotein complex assembly (GO:0022618)	188	8	0.62	+	12.88	2.59e-07	9.43e-05
	regulation of intrinsic apoptotic signaling pathway (GO:2001242)	166	7	0.55	+	12.77	1.61e-06	0.00046
	rRNA processing (GO:0006364)	220	9	0.73	+	12.39	6.04e-08	2.49e-05
	ribonucleoprotein complex subunit organization (GO:0071826)	196	8	0.65	+	12.36	3.51e-07	0.000125
	cellular macromolecule biosynthetic process (GO:0034645)	764	30	2.52	+	11.89	9.13e-25	2.04e-21
	regulation of mRNA stability (GO:0043488)	181	7	0.6	+	11.71	2.81e-06	0.000721
	cellular amide metabolic process (GO:0043603)	803	31	2.65	+	11.69	1.89e-25	4.94e-22
	regulation of protein ubiquitination (GO:0031396)	214	8	0.71	+	11.32	6.66e-07	0.000222
	regulation of RNA stability (GO:0043487)	193	7	0.64	+	10.98	4.22e-06	0.001
	rRNA metabolic process (GO:0016072)	250	9	0.83	+	10.9	1.72e-07	6.75e-05
	regulation of ubiquitin-dependent protein catabolic process (GO:2000058)	169	6	0.56	+	10.75	2.4e-05	0.00448
	non-membrane-bounded organelle assembly (GO:0140694)	312	11	1.03	+	10.67	7.99e-09	4.18e-06
	positive regulation of translation (GO:0045727)	142	5	0.47	+	10.66	0.000124	0.0183
	regulation of mRNA catabolic process (GO:0061013)	199	7	0.66	+	10.65	5.13e-06	0.00117
	regulation of protein modification by small protein conjugation or removal (GO:1903320)	256	9	0.85	+	10.64	2.09e-07	8e-05
	ribonucleoprotein complex biogenesis (GO:0022613)	429	15	1.42	+	10.59	1.2e-11	7.21e-09
	regulation of mRNA metabolic process (GO:1903311)	324	11	1.07	+	10.28	1.17e-08	5.71e-06
	regulation of proteolysis involved in cellular protein catabolic process (GO:1903050)	225	7	0.74	+	9.42	1.12e-05	0.0023
	negative regulation of cellular catabolic process (GO:0031330)	266	8	0.88	+	9.11	3.21e-06	0.000812
	negative regulation of translation (GO:0017148)	167	5	0.55	+	9.07	0.000258	0.0334
	positive regulation of cellular amide metabolic process (GO:0034250)	168	5	0.55	+	9.01	0.000265	0.0334
	regulation of RNA splicing (GO:0043484)	180	5	0.59	+	8.41	0.00036	0.0431
	protein stabilization (GO:0050821)	217	6	0.72	+	8.37	9.27e-05	0.0144
	negative regulation of cell growth (GO:0030308)	186	5	0.61	+	8.14	0.000417	0.0488
	regulation of cellular protein catabolic process (GO:1903362)	261	7	0.86	+	8.12	2.82e-05	0.00515
	macromolecule biosynthetic process (GO:0009059)	1291	33	4.26	+	7.74	8.92e-22	1.55e-18
	post-transcriptional regulation of gene expression (GO:0010608)	517	13	1.71	+	7.61	1.56e-08	7.4e-06
	mRNA splicing, via spliceosome (GO:0000398)	239	6	0.79	+	7.6	0.000155	0.0215
	RNA splicing, via transesterification reactions with bulged adenosine as nucleophile (GO:0000377)	239	6	0.79	+	7.6	0.000155	0.0213
	regulation of apoptotic signaling pathway (GO:2001233)	361	9	1.19	+	7.55	3.34e-06	0.000832
	ncRNA processing (GO:0034470)	404	10	1.33	+	7.49	9.67e-07	0.000303
	RNA splicing, via transesterification reactions (GO:0000375)	243	6	0.8	+	7.48	0.000169	0.0229
	negative regulation of catabolic process (GO:0009895)	325	8	1.07	+	7.45	1.34e-05	0.00265
	biological process involved in symbiotic interaction (GO:0044403)	245	6	0.81	+	7.42	0.000177	0.0237
	regulation of protein stability (GO:0031647)	329	8	1.09	+	7.36	1.46e-05	0.00278
	cellular nitrogen compound biosynthetic process (GO:0044271)	1381	33	4.56	+	7.24	6.85e-21	9.76e-18
	organonitrogen compound biosynthetic process (GO:1901566)	1331	30	4.4	+	6.82	4.19e-18	5.47e-15
	regulation of translation (GO:0006417)	402	9	1.33	+	6.78	7.82e-06	0.00173
	regulation of protein catabolic process (GO:0042176)	403	8	1.33	+	6.01	5.98e-05	0.0101
	regulation of cellular catabolic process (GO:0031329)	866	17	2.86	+	5.94	2.63e-09	1.42e-06
	regulation of cellular amide metabolic process (GO:0034248)	460	9	1.52	+	5.92	2.23e-05	0.00421
	gene expression (GO:0010467)	2080	40	6.87	+	5.82	1.11e-22	2.18e-19
	ncRNA metabolic process (GO:0034660)	524	10	1.73	+	5.78	9.27e-06	0.00199
	RNA processing (GO:0006396)	858	16	2.83	+	5.65	1.71e-08	7.9e-06
	regulation of catabolic process (GO:0009894)	1005	17	3.32	+	5.12	2.3e-08	1.03e-05
	regulation of cellular macromolecule biosynthetic process (GO:2000112)	551	9	1.82	+	4.95	8.8e-05	0.0139
	negative regulation of gene expression (GO:0010629)	888	14	2.93	+	4.77	1.13e-06	0.000335
	organelle assembly (GO:0070925)	787	12	2.6	+	4.62	1.03e-05	0.00217
	regulation of proteolysis (GO:0030162)	737	11	2.43	+	4.52	3.04e-05	0.00548
	cellular biosynthetic process (GO:0044249)	2255	33	7.45	+	4.43	1.3e-14	1.27e-11
	organic substance biosynthetic process (GO:1901576)	2325	33	7.68	+	4.3	3.11e-14	2.56e-11
	positive regulation of gene expression (GO:0010628)	1132	16	3.74	+	4.28	7.09e-07	0.000231
	RNA metabolic process (GO:0016070)	1442	20	4.76	+	4.2	2.68e-08	1.17e-05
	biosynthetic process (GO:0009058)	2390	33	7.89	+	4.18	6.8e-14	5.08e-11
	cellular nitrogen compound metabolic process (GO:0034641)	3354	46	11.08	+	4.15	6.17e-21	9.67e-18
	negative regulation of cellular protein metabolic process (GO:0032269)	972	12	3.21	+	3.74	7.88e-05	0.0129
	protein-containing complex organization (GO:0043933)	1410	17	4.66	+	3.65	2.59e-06	0.000688
	protein-containing complex assembly (GO:0065003)	1254	15	4.14	+	3.62	1.25e-05	0.00251
	cellular protein metabolic process (GO:0044267)	3349	39	11.06	+	3.53	1.86e-14	1.62e-11
	macromolecule catabolic process (GO:0009057)	951	11	3.14	+	3.5	0.000283	0.0352
	negative regulation of protein metabolic process (GO:0051248)	1040	12	3.43	+	3.49	0.000148	0.0209
	nucleic acid metabolic process (GO:0090304)	2109	24	6.97	+	3.45	3.12e-08	1.32e-05
	protein metabolic process (GO:0019538)	3953	42	13.06	+	3.22	1.81e-14	1.67e-11
	cellular macromolecule metabolic process (GO:0044260)	4236	45	13.99	+	3.22	6.7e-16	7.5e-13
	biological process involved in interspecies interaction between organisms (GO:0044419)	1558	15	5.15	+	2.92	0.000148	0.0211
	regulation of apoptotic process (GO:0042981)	1456	14	4.81	+	2.91	0.000259	0.0333
	nucleobase-containing compound metabolic process (GO:0006139)	2610	25	8.62	+	2.9	4.08e-07	0.000142
	cellular component biogenesis (GO:0044085)	2630	25	8.69	+	2.88	4.71e-07	0.000161
	regulation of programmed cell death (GO:0043067)	1484	14	4.9	+	2.86	0.000315	0.0386
	negative regulation of nitrogen compound metabolic process (GO:0051172)	2399	22	7.92	+	2.78	5.5e-06	0.00123
	macromolecule metabolic process (GO:0043170)	5847	53	19.31	+	2.74	4.04e-17	4.86e-14
	heterocycle metabolic process (GO:0046483)	2778	25	9.17	+	2.72	1.32e-06	0.000382
	cellular aromatic compound metabolic process (GO:0006725)	2831	25	9.35	+	2.67	1.87e-06	0.000513
	regulation of intracellular signal transduction (GO:1902531)	1704	15	5.63	+	2.67	0.000388	0.0461
	negative regulation of macromolecule metabolic process (GO:0010605)	2751	24	9.09	+	2.64	4.1e-06	0.000989
	negative regulation of cellular metabolic process (GO:0031324)	2539	22	8.39	+	2.62	1.37e-05	0.00268
	organonitrogen compound metabolic process (GO:1901564)	5000	43	16.51	+	2.6	1.26e-11	7.3e-09
	negative regulation of metabolic process (GO:0009892)	2968	25	9.8	+	2.55	4.42e-06	0.00104
	regulation of cellular protein metabolic process (GO:0032268)	2409	20	7.96	+	2.51	7.12e-05	0.0119
	nitrogen compound metabolic process (GO:0006807)	6583	54	21.74	+	2.48	1.3e-15	1.36e-12
	regulation of protein metabolic process (GO:0051246)	2577	21	8.51	+	2.47	5.77e-05	0.00994
	organic cyclic compound metabolic process (GO:1901360)	3076	25	10.16	+	2.46	8.4e-06	0.00183
	cellular component assembly (GO:0022607)	2398	19	7.92	+	2.4	0.000212	0.0279
	primary metabolic process (GO:0044238)	7091	54	23.42	+	2.31	4.28e-14	3.36e-11
	cellular metabolic process (GO:0044237)	7138	53	23.57	+	2.25	6.16e-13	4.39e-10
	organelle organization (GO:0006996)	3424	25	11.31	+	2.21	5.79e-05	0.00987
	organic substance metabolic process (GO:0071704)	7577	54	25.02	+	2.16	9.45e-13	6.44e-10
	regulation of biological quality (GO:0065008)	3730	26	12.32	+	2.11	9.75e-05	0.015
	metabolic process (GO:0008152)	8019	55	26.48	+	2.08	2.06e-12	1.29e-09
	positive regulation of macromolecule metabolic process (GO:0010604)	3507	24	11.58	+	2.07	0.000272	0.0341
	positive regulation of metabolic process (GO:0009893)	3816	26	12.6	+	2.06	0.00013	0.0189
	cellular component organization or biogenesis (GO:0071840)	5659	36	18.69	+	1.93	1.44e-05	0.00278
	regulation of gene expression (GO:0010468)	4833	30	15.96	+	1.88	0.000251	0.0327
	negative regulation of cellular process (GO:0048523)	4867	30	16.07	+	1.87	0.00026	0.0331
	negative regulation of biological process (GO:0048519)	5288	32	17.46	+	1.83	0.000143	0.0206
	regulation of nitrogen compound metabolic process (GO:0051171)	5689	33	18.79	+	1.76	0.000322	0.0391
	regulation of cellular metabolic process (GO:0031323)	6040	34	19.95	+	1.7	0.000423	0.0491
	cellular process (GO:0009987)	15176	65	50.12	+	1.3	5.04e-06	0.00116

## Sheet: GO cellular component
Analysis Type:	PANTHER Overrepresentation Test (Released 20220712)
Annotation Version and Release Date:	GO Ontology database DOI: 10.5281/zenodo.6399963 Released 2022-03-22
Analyzed List:	Client Text Box Input (Homo sapiens)
Reference List:	Homo sapiens (all genes in database)
Test Type:	FISHER
Correction:	FDR
GO cellular component complete	Homo sapiens - REFLIST (20589)	Client Text Box Input (68)	Client Text Box Input (expected)	Client Text Box Input (over/under)	Client Text Box Input (fold Enrichment)	Client Text Box Input (raw P-value)	Client Text Box Input (FDR)
extrinsic component of mitochondrial outer membrane (GO:0031315)	4	2	0.01	+	> 100	0.000159	0.00705
cytosolic small ribosomal subunit (GO:0022627)	45	19	0.15	+	> 100	3.34e-33	1.36e-30
cytosolic ribosome (GO:0022626)	104	26	0.34	+	75.69	1.46e-40	1.49e-37
small ribosomal subunit (GO:0015935)	77	19	0.25	+	74.71	2e-29	6.81e-27
ribosomal subunit (GO:0044391)	187	26	0.62	+	42.1	1.39e-34	9.46e-32
cytosolic large ribosomal subunit (GO:0022625)	58	8	0.19	+	41.76	4.45e-11	3.03e-09
ribosome (GO:0005840)	226	27	0.75	+	36.17	2.53e-34	1.29e-31
cytoplasmic stress granule (GO:0010494)	84	10	0.28	+	36.05	5.45e-13	4.12e-11
polysomal ribosome (GO:0042788)	32	3	0.11	+	28.39	0.000207	0.0088
large ribosomal subunit (GO:0015934)	113	8	0.37	+	21.44	6.05e-09	3.25e-07
mitochondrial nucleoid (GO:0042645)	45	3	0.15	+	20.19	0.000531	0.0197
nucleoid (GO:0009295)	45	3	0.15	+	20.19	0.000531	0.0193
polysome (GO:0005844)	66	4	0.22	+	18.35	8.36e-05	0.00397
ribonucleoprotein complex (GO:1990904)	687	40	2.27	+	17.63	9.93e-41	2.03e-37
cytoplasmic ribonucleoprotein granule (GO:0036464)	246	13	0.81	+	16	2.38e-12	1.73e-10
focal adhesion (GO:0005925)	422	21	1.39	+	15.07	4.21e-19	5.73e-17
ribonucleoprotein granule (GO:0035770)	264	13	0.87	+	14.91	5.56e-12	3.91e-10
cell-substrate junction (GO:0030055)	431	21	1.42	+	14.75	6.36e-19	8.11e-17
catalytic step 2 spliceosome (GO:0071013)	88	4	0.29	+	13.76	0.000241	0.0101
P-body (GO:0000932)	96	4	0.32	+	12.62	0.000332	0.0136
nucleosome (GO:0000786)	99	4	0.33	+	12.23	0.000372	0.0149
ficolin-1-rich granule lumen (GO:1904813)	124	5	0.41	+	12.21	6.68e-05	0.00333
ficolin-1-rich granule (GO:0101002)	185	5	0.61	+	8.18	0.000407	0.016
protein-DNA complex (GO:0032993)	191	5	0.63	+	7.93	0.000469	0.0181
anchoring junction (GO:0070161)	848	22	2.8	+	7.86	2.69e-14	2.11e-12
spliceosomal complex (GO:0005681)	196	5	0.65	+	7.72	0.000526	0.0199
extracellular exosome (GO:0070062)	2100	45	6.94	+	6.49	2.57e-28	7.51e-26
extracellular vesicle (GO:1903561)	2123	45	7.01	+	6.42	4.07e-28	1.04e-25
extracellular organelle (GO:0043230)	2124	45	7.02	+	6.41	4.15e-28	9.4e-26
extracellular membrane-bounded organelle (GO:0065010)	2124	45	7.02	+	6.41	4.15e-28	8.46e-26
organelle outer membrane (GO:0031968)	236	5	0.78	+	6.41	0.00119	0.0373
outer membrane (GO:0019867)	238	5	0.79	+	6.36	0.00123	0.0381
postsynaptic specialization (GO:0099572)	345	7	1.14	+	6.14	0.000156	0.00708
secretory granule lumen (GO:0034774)	320	6	1.06	+	5.68	0.00071	0.025
postsynaptic density (GO:0014069)	322	6	1.06	+	5.64	0.000733	0.0253
cytoplasmic vesicle lumen (GO:0060205)	323	6	1.07	+	5.62	0.000744	0.0253
vesicle lumen (GO:0031983)	325	6	1.07	+	5.59	0.000768	0.0257
asymmetric synapse (GO:0032279)	327	6	1.08	+	5.56	0.000793	0.0261
nucleolus (GO:0005730)	997	18	3.29	+	5.47	2.97e-09	1.64e-07
neuron to neuron synapse (GO:0098984)	352	6	1.16	+	5.16	0.00115	0.0367
extracellular space (GO:0005615)	3419	46	11.29	+	4.07	1.37e-20	1.99e-18
postsynapse (GO:0098794)	620	8	2.05	+	3.91	0.00104	0.0335
cell junction (GO:0030054)	2116	26	6.99	+	3.72	1.26e-09	7.13e-08
supramolecular complex (GO:0099080)	1376	16	4.54	+	3.52	8.6e-06	0.000439
vesicle (GO:0031982)	3964	46	13.09	+	3.51	5.93e-18	6.37e-16
intracellular non-membrane-bounded organelle (GO:0043232)	5179	56	17.1	+	3.27	8.02e-23	1.49e-20
non-membrane-bounded organelle (GO:0043228)	5180	56	17.11	+	3.27	8.1e-23	1.38e-20
nucleoplasm (GO:0005654)	4124	44	13.62	+	3.23	1.76e-15	1.5e-13
extracellular region (GO:0005576)	4393	46	14.51	+	3.17	3.73e-16	3.81e-14
synapse (GO:0045202)	1343	14	4.44	+	3.16	0.000112	0.00522
nuclear lumen (GO:0031981)	4487	45	14.82	+	3.04	6.24e-15	5.1e-13
protein-containing complex (GO:0032991)	5702	57	18.83	+	3.03	9.19e-22	1.44e-19
cytosol (GO:0005829)	5444	53	17.98	+	2.95	1.38e-18	1.66e-16
organelle lumen (GO:0043233)	5603	51	18.51	+	2.76	3.94e-16	3.83e-14
intracellular organelle lumen (GO:0070013)	5603	51	18.51	+	2.76	3.94e-16	3.65e-14
membrane-enclosed lumen (GO:0031974)	5603	51	18.51	+	2.76	3.94e-16	3.49e-14
nucleus (GO:0005634)	7663	60	25.31	+	2.37	3.87e-18	4.38e-16
cytoplasm (GO:0005737)	12030	63	39.73	+	1.59	4.79e-10	2.96e-08
intracellular membrane-bounded organelle (GO:0043231)	12120	63	40.03	+	1.57	5.7e-10	3.42e-08
intracellular organelle (GO:0043229)	13209	66	43.63	+	1.51	1.06e-10	7e-09
membrane-bounded organelle (GO:0043227)	13187	65	43.55	+	1.49	9.68e-10	5.64e-08
organelle (GO:0043226)	14021	67	46.31	+	1.45	2.13e-10	1.36e-08
membrane (GO:0016020)	9947	47	32.85	+	1.43	0.000608	0.0218
intracellular anatomical structure (GO:0005622)	14901	66	49.21	+	1.34	1.66e-07	8.7e-06
integral component of membrane (GO:0016021)	5800	6	19.16	-	0.31	0.000196	0.00853
intrinsic component of membrane (GO:0031224)	5959	6	19.68	-	0.3	7.94e-05	0.00386

## Sheet: GO molecular function
Analysis Type:	PANTHER Overrepresentation Test (Released 20220712)
Annotation Version and Release Date:	GO Ontology database DOI: 10.5281/zenodo.6399963 Released 2022-03-22
Analyzed List:	Client Text Box Input (Homo sapiens)
Reference List:	Homo sapiens (all genes in database)
Test Type:	FISHER
Correction:	FDR
GO molecular function complete	Homo sapiens - REFLIST (20589)	Client Text Box Input (68)	Client Text Box Input (expected)	Client Text Box Input (over/under)	Client Text Box Input (fold Enrichment)	Client Text Box Input (raw P-value)	Client Text Box Input (FDR)
large ribosomal subunit rRNA binding (GO:0070180)	6	3	0.02	+	> 100	2.83e-06	0.00073
ubiquitin ligase inhibitor activity (GO:1990948)	9	4	0.03	+	> 100	7.51e-08	2.83e-05
protein disaggregase activity (GO:0140545)	5	2	0.02	+	> 100	0.000222	0.0351
ubiquitin-protein transferase inhibitor activity (GO:0055105)	10	4	0.03	+	> 100	1.05e-07	3.67e-05
C3HC4-type RING finger domain binding (GO:0055131)	6	2	0.02	+	> 100	0.000295	0.0453
N6-methyladenosine-containing RNA binding (GO:1990247)	10	3	0.03	+	90.83	9.53e-06	0.00234
protein tag (GO:0031386)	14	4	0.05	+	86.51	3.17e-07	9.73e-05
mRNA 5'-UTR binding (GO:0048027)	26	7	0.09	+	81.52	1.22e-11	6.64e-09
ubiquitin-protein transferase regulator activity (GO:0055106)	22	4	0.07	+	55.05	1.52e-06	0.000414
rRNA binding (GO:0019843)	66	11	0.22	+	50.46	1.19e-15	8.32e-13
structural constituent of ribosome (GO:0003735)	168	25	0.55	+	45.06	6.9e-34	1.69e-30
poly(A) binding (GO:0008143)	23	3	0.08	+	39.49	8.4e-05	0.0159
poly(U) RNA binding (GO:0008266)	25	3	0.08	+	36.33	0.000105	0.0191
poly-pyrimidine tract binding (GO:0008187)	28	3	0.09	+	32.44	0.000144	0.0252
poly-purine tract binding (GO:0070717)	29	3	0.1	+	31.32	0.000158	0.0267
mRNA 3'-UTR binding (GO:0003730)	95	7	0.31	+	22.31	4.4e-08	1.8e-05
mRNA binding (GO:0003729)	315	16	1.04	+	15.38	9.1e-15	5.58e-12
single-stranded RNA binding (GO:0003727)	85	4	0.28	+	14.25	0.000212	0.0347
translation regulator activity (GO:0045182)	149	6	0.49	+	12.19	1.21e-05	0.00269
ubiquitin protein ligase binding (GO:0031625)	300	11	0.99	+	11.1	5.4e-09	2.65e-06
ubiquitin-like protein ligase binding (GO:0044389)	319	11	1.05	+	10.44	9.98e-09	4.45e-06
structural molecule activity (GO:0005198)	729	25	2.41	+	10.38	4.64e-19	3.79e-16
RNA binding (GO:0003723)	1655	52	5.47	+	9.51	9.47e-43	4.65e-39
cadherin binding (GO:0045296)	324	9	1.07	+	8.41	1.41e-06	0.000407
ATP hydrolysis activity (GO:0016887)	363	8	1.2	+	6.67	2.9e-05	0.00593
cell adhesion molecule binding (GO:0050839)	551	10	1.82	+	5.5	1.42e-05	0.00303
nucleic acid binding (GO:0003676)	3999	56	13.21	+	4.24	1.07e-28	1.75e-25
heterocyclic compound binding (GO:1901363)	5974	58	19.73	+	2.94	8.22e-22	1.01e-18
organic cyclic compound binding (GO:0097159)	6046	58	19.97	+	2.9	1.56e-21	1.53e-18
enzyme binding (GO:0019899)	2077	19	6.86	+	2.77	3.08e-05	0.00605
protein binding (GO:0005515)	14421	65	47.63	+	1.36	1.88e-07	6.16e-05
binding (GO:0005488)	16572	67	54.73	+	1.22	1e-05	0.00234

## Sheet: PANTHER protein class
Analysis Type:	PANTHER Overrepresentation Test (Released 20220712)
Annotation Version and Release Date:	PANTHER version 17.0 Released 2022-02-22
Analyzed List:	Client Text Box Input (Homo sapiens)
Reference List:	Homo sapiens (all genes in database)
Test Type:	FISHER
Correction:	FDR
PANTHER Protein Class	Homo sapiens - REFLIST (20589)	Client Text Box Input (68)	Client Text Box Input (expected)	Client Text Box Input (over/under)	Client Text Box Input (fold Enrichment)	Client Text Box Input (raw P-value)	Client Text Box Input (FDR)
ribosomal protein (PC00202)	177	23	0.58	+	39.34	7.14e-30	1.4e-27
translational protein (PC00263)	334	24	1.1	+	21.76	1.87e-25	1.84e-23
RNA metabolism protein (PC00031)	827	12	2.73	+	4.39	1.67e-05	0.00109
